# Supplementary material
Source: PubMed Central journal article supplement (PMC7092740)
Supplement: ESO883461_Supplemental_Tables.pdf [file ESO883461_Supplemental_Tables.pdf]

Online Table i: Table of quality assessment of included studies using modified CASP tool

| Studies               | CASP tool questions |                    |                     |                               |                             |                    |                   |                            |               |                  |                       |                       |                           |                         |                         |                          | Total | Overall Rating |
|-----------------------|---------------------|--------------------|---------------------|-------------------------------|-----------------------------|--------------------|-------------------|----------------------------|---------------|------------------|-----------------------|-----------------------|---------------------------|-------------------------|-------------------------|--------------------------|-------|----------------|
|                       | Clear Question?     | Sampling Adequate? | Compare Ref. Stand? | All pats. Index + Ref. Stand? | Blinding Ref. Stand Result? | Pats Status Clear? | Methods detailed? | Confound. Factors + Consi? | Result Clear? | Result Validity? | Result Believability? | Result Applicability? | Index test Applicability? | All outcomes important? | Fit available evidence? | Impact using index test? |       |                |
| Bisdas et al          | Y                   | Y                  | Y                   | Y                             | Y                           | Y                  | Y                 | C/C                        | D             | D                | Y                     | Y                     | Y                         | Y                       | Y                       | D                        | 15/17 | Good           |
| Hom et al             | Y                   | Y                  | Y                   | Y                             | N                           | Y                  | Y                 | Y/Y                        | D             | D                | Y                     | Y                     | Y                         | Y                       | Y                       | D                        | 17/17 | Excellent      |
| Yassi et al           | Y                   | Y                  | Y                   | Y                             | N                           | Y                  | Y                 | Y/Y                        | D             | D                | Y                     | Y                     | Y                         | Y                       | Y                       | D                        | 17/17 | Excellent      |
| Shinoyama et al.      | Y                   | Y                  | Y                   | Y                             | C                           | Y                  | Y                 | Y/N                        | D             | D                | Y                     | Y                     | Y                         | Y                       | Y                       | D                        | 15/17 | Good           |
| Bennink et al.        | Y                   | Y                  | Y                   | Y                             | Y                           | Y                  | Y                 | C/C                        | D             | D                | Y                     | Y                     | Y                         | C                       | Y                       | D                        | 13/17 | Poor           |
| Aviv et al            | Y                   | Y                  | Y                   | Y                             | N                           | Y                  | Y                 | Y/Y                        | D             | D                | Y                     | Y                     | Y                         | Y                       | Y                       | D                        | 17/17 | Excellent      |
| Lin et al             | Y                   | Y                  | Y                   | Y                             | N                           | Y                  | Y                 | Y/N                        | D             | D                | Y                     | Y                     | Y                         | Y                       | Y                       | D                        | 16/17 | Good           |
| Jain et al            | Y                   | Y                  | Y                   | Y                             | C                           | Y                  | Y                 | Y/C                        | D             | D                | Y                     | Y                     | Y                         | Y                       | Y                       | D                        | 15/17 | Good           |
| Ozkul-Wermester et al | Y                   | Y                  | Y                   | Y                             | N                           | Y                  | Y                 | Y/Y                        | D             | D                | Y                     | Y                     | Y                         | Y                       | Y                       | D                        | 17/17 | Excellent      |
| Souza et al           | Y                   | Y                  | Y                   | Y                             | N                           | Y                  | Y                 | Y/Y                        | D             | D                | Y                     | Y                     | Y                         | Y                       | Y                       | D                        | 17/17 | Excellent      |
| Ke Lin et al          | Y                   | Y                  | Y                   | Y                             | N                           | Y                  | Y                 | Y/Y                        | D             | D                | Y                     | Y                     | Y                         | Y                       | Y                       | D                        | 17/17 | Excellent      |
| Yen et al             | Y                   | Y                  | Y                   | Y                             | C                           | Y                  | Y                 | N/N                        | D             | D                | C                     | Y                     | Y                         | C                       | C                       | D                        | 11/17 | Poor           |

Key: Y = yes

C= Can't tell

N= No (in Q5 N = Good/+ & Y = bad/-)

D= either stated explicitly or deducible

Online Table ii: CTP acquisition parameters

| Study     | Type of Scanner                                              | CTP; z-coverage | CTP Technique                     | Slice thickness | CTP Scan time/ phases. | Frame rate or temporal resolution           | CTP colour maps                      | Review Method        | Software principle                                   |
|-----------|--------------------------------------------------------------|-----------------|-----------------------------------|-----------------|------------------------|---------------------------------------------|--------------------------------------|----------------------|------------------------------------------------------|
| Bisdas    | GE Lightspeed QX/I helical (?width/rotation)                 | 20mm            | NS                                | 10mm            | 50s                    | N/S                                         | CBV, CBF, MTT, PS, E, V(EES)         | Visual               | Custom-written, distributed parameter Tracer Kinetic |
| Hom       | Philips 64slice                                              | 80mm            | Cine-mode @ 2 positions           | 5mm             | 240s                   | Variable; 1/s, 0.5/s + delayed acquisitions | CBV, MTT, PS (BBBBP)                 | Visual + threshold   | Deconvolution                                        |
| Yassi     | Toshiba Aquilion one 320-slice & Philips Brilliance 64-slice | 160mm & 80mm    | Whole brain & Jog-mode            | 5mm & 10mm      | 60s                    | 1/1.33s                                     | rCBV, rCBF, rTmax.                   | Visual + threshold   | Deconvolution                                        |
| Shinoyama | Siemens SOMATOM 128-slice                                    | 96mm            | Constant bi-directional           | 5mm             | 30s                    | 1/1.5s                                      | CBF, CBV, MTT, TTP                   | Visual + Threshold   | Deconvolution                                        |
| Bennink   | Variable, all Multidetector 40 - 256 slice                   | 40 – 65mm       | Cine-basal ganglia to Lat. Ventr. | 5mm             | 210s                   | 1/2s & 1/30s delayed acquisitions           | NLR (rPS, rKtrans, rCBV, rCBF, rMTT) | Visual + threshold   | Deconvolution                                        |
| Aviv      | GE 64-slice                                                  | 40mm            | Cine (2-phases, same position)    | 5mm             | 135s                   | 1/0.5s + 1/15s delayed acq.                 | PS, CBV, CBF, MTT                    | Visual + threshold   | Deconvolution                                        |
| Lin       | Siemens 16-slice                                             | 24mm            | Cine (2-sections)                 | (2x12mm)        | 60s                    | 1/0.5s                                      | CBF, CBV, MTT, PS                    | Visual + threshold   | Max. Slope + Deconvolution                           |
| Jain      | Philips Brilliance 64-slice                                  | 40mm            | Successive gantry rotation?       | 5mm             | 60s (2x30)             | 1/2s                                        | rCBV                                 | Visual + whole value | Deconvolution                                        |

|                 |                             |      |                                |     |         |                                          |                       |                    |               |
|-----------------|-----------------------------|------|--------------------------------|-----|---------|------------------------------------------|-----------------------|--------------------|---------------|
| Ozkul-Wermester | GE Lightspeed 64-slice      | 40mm | Cine (2-phases, same position) | 5mm | 150s    | 1/1s + 1/30s delayed acq.                | CBV, CBF, MTT, PS     | Visual + threshold | Deconvolution |
| Souza           | GE Lightspeed 64-slice      | 80mm | Shuttle mode                   | 5mm | 91s     | N/S                                      | rCBF, rCBV, rMTT, rPS | Visual + threshold | Deconvolution |
| Lin Ke          | GE Lightspeed 16-slice      | 20mm | Cine mode                      | 5mm | 60s     | N/S                                      | CBV, ASPECTS          | Visual + threshold | Deconvolution |
| Yen             | Siemens Sensation 128-slice | 96mm | Shuttle mode                   | 5mm | 105.06s | 18@1/1.67s, 5@1/3s, 4@1/15s delayed acq. | rPS, CBV, CBF, TTP    | Visual + threshold | Deconvolution |
